# Supplementary material for: Towards universal health coverage in the WHO African Region: assessing health system functionality, incorporating lessons from COVID-19
Source: PubMed Central journal article supplement — BMJ Glob Health. 2021 Mar 31;6(3):e004618. doi: 10.1136/bmjgh-2020-004618 (PMC8015798; doi:10.1136/bmjgh-2020-004618), 2021-03-31
Supplement: bmjgh-2020-004618supp001.pdf [file bmjgh-2020-004618supp001.pdf]

**Supplementary Appendix:****Towards universal health coverage in the WHO African Region: Assessing health system functionality, incorporating lessons from COVID-19****Background**

This supplement provides additional information to enable persons that would want to replicate the process leading to the results to do so. It highlights how the methods explained in the paper have been implemented using the data, eventually leading to the results. It follows a logical approach from the raw data to the eventual published results.

Appendix Section 1. List of countries in WHO Africa Region by income classification

Appendix Section 2. Notes on constructed index and composite proxy indicators

Appendix Section 3. Results of construct validity tests and sensitivity analyses

## S1. List of countries in the WHO Africa Region by income classifications

| High / Upper Middle Income | Lower-middle Income   | Low Income                  |
|----------------------------|-----------------------|-----------------------------|
| Seychelles (High Income)   | Angola                | Benin                       |
| Algeria                    | Cameroon              | Burkina Faso                |
| Botswana                   | Cabo Verde            | Burundi                     |
| Equatorial Guinea          | Comoros               | Central African Republic    |
| Gabon                      | Congo, Rep.           | Chad                        |
| Mauritius                  | Cote d'Ivoire         | Congo, Dem. Rep.            |
| Namibia                    | Eswatini              | Eritrea                     |
| South Africa               | Ghana                 | Ethiopia                    |
|                            | Kenya                 | Gambia, The                 |
|                            | Lesotho               | Guinea                      |
|                            | Mauritania            | Guinea-Bissau               |
|                            | Nigeria               | Liberia                     |
|                            | Sao Tome and Principe | Madagascar                  |
|                            | Senegal               | Malawi                      |
|                            | Zambia                | Mali                        |
|                            | Zimbabwe              | Mozambique                  |
|                            |                       | Niger                       |
|                            |                       | Rwanda                      |
|                            |                       | Sierra Leone                |
|                            |                       | South Sudan                 |
|                            |                       | Togo                        |
|                            |                       | Uganda                      |
|                            |                       | United Republic of Tanzania |

## S2. Notes on constructed index and composite tracer indicators

| Health System<br>Functionality Capacity | Vital Signs          | Indicator                                                                                  | Data Source                                                                                         | Data Type              |
|-----------------------------------------|----------------------|--------------------------------------------------------------------------------------------|-----------------------------------------------------------------------------------------------------|------------------------|
| Access to Essential<br>Services         | Physical Access      | Generalist and Specialist Medical Practitioners per 1000 population                        | Global Health Workforce Observatory                                                                 | Primary Data           |
|                                         |                      | Nursing personnel density /1000 population (including midwives)                            | Global Health Workforce Observatory                                                                 | Primary Data           |
|                                         |                      | Health Facility Density                                                                    | WHO spatial database of health facilities managed by the public health sector in sub-Saharan Africa | Primary Data           |
|                                         |                      | Hospital beds (per 1000 population)                                                        | WHO Global Health Observatory<br>WHO Service Availability and Readiness Assessment Surveys          | Primary Data           |
|                                         | Financial Access     | Domestic general government health expenditure (% of current health expenditure)           | Global Health Expenditure Database                                                                  | UN Comparable Estimate |
|                                         |                      | Domestic general government health expenditure (% of general government expenditure)       | Global Health Expenditure Database                                                                  | UN Comparable Estimate |
|                                         |                      | Out-of-pocket expenditure per capita, PPP (current international \$)                       | Global Health Expenditure Database                                                                  | UN Comparable Estimate |
|                                         |                      | Out-of-pocket expenditure (% of current health expenditure)                                | Global Health Expenditure Database                                                                  | UN Comparable Estimate |
|                                         |                      | Incidence of catastrophic expenditure (%): At 10% of household total consumption or income | Global Health Expenditure Database                                                                  | UN Comparable Estimate |
|                                         | Sociocultural Access | Secondary education completion rate, female (% of relevant age group)                      | World Development Indicators –World Bank                                                            | UN Comparable Estimate |
|                                         |                      | Primary education completion rate, female (% of relevant age group)                        | World Development Indicators –World Bank                                                            | UN Comparable Estimate |
|                                         |                      | Women's Labor Force Participation                                                          | The Ibrahim Index of African Governance <sup>1</sup>                                                | Primary Data           |

|                                      |                                       |                                                                                                             |                                                                  |                        |
|--------------------------------------|---------------------------------------|-------------------------------------------------------------------------------------------------------------|------------------------------------------------------------------|------------------------|
|                                      |                                       | Intimate Partner Violence Against Women (%)                                                                 | Violence Against Women Inter-Agency Group on Estimation and Data | UN Comparable Estimate |
| <b>Demand for Essential Services</b> | <b>Healthy Actions</b>                | Antenatal Coverage (% receiving 4+ visits)                                                                  | DHS World Health Statistics                                      | Primary Data           |
|                                      |                                       | Community health workers density (per 1000 population)                                                      | Global Health Workforce Observatory                              | Primary Data           |
|                                      |                                       | Total alcohol consumption per capita (liters of pure alcohol, projected estimates, 15+ years of age)        | WHO Global Health Observatory                                    | UN Comparable Estimate |
|                                      |                                       | Smoking prevalence, total (ages 15+)                                                                        | WHO Global Health Observatory                                    | UN Comparable Estimate |
|                                      |                                       |                                                                                                             | DHS WHO Global Health Observatory                                | Primary Data           |
|                                      | <b>Health Seeking Behaviour</b>       | ANC 1 – ANC 4 drop out                                                                                      | WHO AFRO Immunization Database                                   | Primary Data           |
|                                      |                                       | DTP 1 - DTP 3 drop out                                                                                      | WHO AFRO Immunization Database                                   | Primary Data           |
|                                      |                                       | DTP3-MCV drop out                                                                                           | WHO Global Health Observatory                                    | UN Comparable Estimate |
|                                      |                                       | Demand for family planning satisfied by modern methods (% of married women with demand for family planning) | DHS WHO UHC Global Monitoring Report <sup>2</sup>                | Primary Data           |
|                                      |                                       | Care seeking behavior for child pneumonia                                                                   | WHO Service Availability and Readiness Assessment Surveys        | Primary Data           |
| <b>Quality of Care</b>               | <b>User Experiences</b>               | General Service Readiness (%)                                                                               | The Ibrahim Index of African Governance <sup>1</sup>             | Primary Data           |
|                                      |                                       | Satisfaction with Basic Health Services (%)                                                                 | WHO Service Availability and Readiness Assessment Surveys        | Primary Data           |
|                                      | <b>Patient Safety</b>                 | Standard Precautions for Infection Prevention and Control (%)                                               | WHO Global Health Observatory                                    | Primary Data           |
|                                      |                                       | Still birth rate (per 1000 total births)                                                                    | WHO Global Health Observatory                                    | UN Comparable Estimate |
|                                      | <b>Effectiveness of Interventions</b> | Tuberculosis treatment success rate (% of new cases)                                                        | WHO Global Health Observatory                                    | UN Comparable Estimate |

|                                  |                           |                        |                                                                                                                                                                         |                                        |                        |
|----------------------------------|---------------------------|------------------------|-------------------------------------------------------------------------------------------------------------------------------------------------------------------------|----------------------------------------|------------------------|
|                                  |                           |                        | Mortality from CVD, cancer, diabetes or CRD between exact ages 30 and 70 (%)                                                                                            | WHO Global Health Observatory          | UN Comparable Estimate |
|                                  |                           |                        | Suicide mortality rate (per 100,000 population)                                                                                                                         | WHO Global Health Observatory          | UN Comparable Estimate |
| <b>Health Systems Resilience</b> | <b>General Resilience</b> | <b>Awareness</b>       | The County has documented up to date (under 1 year old) mapping of the health system assets – specifically staff, infrastructure, commodities                           | WHO AFRO Geographic Information System | Primary Data           |
|                                  |                           |                        | The County has documented up to date (under 1 year old) mapping of potential shocks – covering acute and chronic disease, environmental, economic, and political shocks | WHO AFRO Geographic Information System | Primary Data           |
|                                  |                           |                        | The County has a functional surveillance network reporting both weekly on notifiable diseases, and monthly on health system capacity changes                            | WHO AFRO Geographic Information System | Primary Data           |
|                                  |                           |                        | Simulation exercises have been conducted in the past 1 year, assessing capacity to respond to potential shock events of highest risk of occurrence                      | WHO AFRO Geographic Information System | Primary Data           |
|                                  |                           |                        | There are agreed standard operating procedures for ensuring functional staff, supplies and infrastructure in the event of a shock event                                 | WHO AFRO Geographic Information System | Primary Data           |
|                                  |                           |                        |                                                                                                                                                                         |                                        |                        |
|                                  |                           | <b>Diversity</b>       | Health facilities have functional therapeutics committees that are monitoring rare / uncommon events impacting service provision                                        | WHO AFRO Geographic Information System | Primary Data           |
|                                  |                           |                        | There are no stock outs in the past 1 year for common supportive drugs and supplies used in emergency (Oxygen, analgesics, PPEs, and other supportive supplies)         | WHO AFRO Geographic Information System | Primary Data           |
|                                  |                           |                        | Health facilities have micro-plans, to take essential services to hard to reach populations in their areas of responsibility                                            | WHO AFRO Geographic Information System | Primary Data           |
|                                  |                           |                        | Health facilities are aware of the range of essential services they are expected to provide, and have plans to expand their capacity to provide these                   | WHO AFRO Geographic Information System | Primary Data           |
|                                  |                           |                        | Health facilities are utilizing multiple service delivery approaches: fixed sites, outreaches, mobile clinics, e-referrals, etc to take services to their population    | WHO AFRO Geographic Information System | Primary Data           |
|                                  |                           | <b>Self-Regulation</b> | The primary care (front line) facilities have the needed epidemiology and other technical skills to identify and isolate health threats                                 | WHO AFRO Geographic Information System | Primary Data           |

|  |  |                       |                                                                                                                                                                                                               |                                        |              |
|--|--|-----------------------|---------------------------------------------------------------------------------------------------------------------------------------------------------------------------------------------------------------|----------------------------------------|--------------|
|  |  |                       | There are standard operating procedures to allow health facility staff to repurpose their infrastructure, staff and medical supplies when facing potential threats                                            | WHO AFRO Geographic Information System | Primary Data |
|  |  |                       | There exist processes to guide facilities on how to identify and shield staff, infrastructure and medical supplies for continuing essential services provision during threats                                 | WHO AFRO Geographic Information System | Primary Data |
|  |  |                       | Mechanisms exist for coordinating additional capacities (staff, infrastructure, medical supplies) mobilized to respond to threats                                                                             | WHO AFRO Geographic Information System | Primary Data |
|  |  |                       | Sub County and health facility staff have the required decision space, authority and protocols to initiate action and spend funds in event of shock events                                                    | WHO AFRO Geographic Information System | Primary Data |
|  |  | <b>Mobilization</b>   | There are functional mechanisms for communication and engagement with non-public health providers working in the area of responsibility of public facilities – such as private sector, NGOs, CSOs, and others | WHO AFRO Geographic Information System | Primary Data |
|  |  |                       | There are functional mechanisms for communication and engagement with community groups in the area of responsibility of public facilities                                                                     | WHO AFRO Geographic Information System | Primary Data |
|  |  |                       | There are functional mechanisms for communication and engagement with other health related sectors in the area of responsibility of public facilities – such as agriculture, water, security, etc             | WHO AFRO Geographic Information System | Primary Data |
|  |  |                       | There are pre-agreed mechanisms for sharing of personnel, funds and capacities amongst stakeholders working within their areas of responsibility of facilities                                                | WHO AFRO Geographic Information System | Primary Data |
|  |  |                       | Public, and private sources of additional capacities (staff, infrastructure, medical supplies) for surge capacity are known and procedures to bring these on board are available                              | WHO AFRO Geographic Information System | Primary Data |
|  |  | <b>Transformation</b> | There is regularly updated information on the level of functionality of the health system                                                                                                                     | WHO AFRO Geographic Information System | Primary Data |
|  |  |                       | There are agreed protocols to guide absorption of resources and skills mobilized during a response to an event into the routine system                                                                        | WHO AFRO Geographic Information System | Primary Data |
|  |  |                       | There are protocols to constantly monitor essential service provision during a shock event exist                                                                                                              | WHO AFRO Geographic Information System | Primary Data |

|                                |                                |                                                                                               |                                                                                                                                                          |                                         |              |
|--------------------------------|--------------------------------|-----------------------------------------------------------------------------------------------|----------------------------------------------------------------------------------------------------------------------------------------------------------|-----------------------------------------|--------------|
| <b>IHR Core Capacity Score</b> |                                |                                                                                               | There is guidance on comprehensive recovery planning based on assessment, and investment across the health system                                        | WHO AFRO Geographic Information System  | Primary Data |
|                                |                                |                                                                                               | Process documentation and intelligence generation is planned for shock events, and a repository of such lessons exists                                   | WHO AFRO Geographic Information System  | Primary Data |
|                                |                                | <b>National legislation, policy &amp; financing</b>                                           | Legislation, laws, regulations, administrative requirements, policies or other government instruments in place are sufficient for implementation of IHR. | WHO e-State Party Annual Reporting tool | Primary Data |
|                                |                                |                                                                                               | Funding is available and accessible for implementing IHR NFP functions and IHR core capacity strengthening.                                              | WHO e-State Party Annual Reporting tool | Primary Data |
|                                |                                | <b>Coordination and NFP communications</b>                                                    | A mechanism is established for the coordination of relevant sectors in the implementation of IHR.                                                        | WHO e-State Party Annual Reporting tool | Primary Data |
|                                |                                |                                                                                               | IHR NFP functions and operations are in place as defined by the IHR (2005).                                                                              | WHO e-State Party Annual Reporting tool | Primary Data |
|                                |                                | <b>Surveillance</b>                                                                           | Indicator based, surveillance includes an early warning <sup>3</sup> function for the early detection of a public health event.                          | WHO e-State Party Annual Reporting tool | Primary Data |
|                                |                                |                                                                                               | Event based surveillance is established.                                                                                                                 | WHO e-State Party Annual Reporting tool | Primary Data |
|                                |                                | <b>Response</b>                                                                               | Public health emergency response mechanisms are established.                                                                                             | WHO e-State Party Annual Reporting tool | Primary Data |
|                                |                                |                                                                                               | Case management procedures are implemented for IHR relevant hazards.                                                                                     | WHO e-State Party Annual Reporting tool | Primary Data |
|                                |                                |                                                                                               | Infection prevention and control (IPC) is established at national and hospital levels.                                                                   | WHO e-State Party Annual Reporting tool | Primary Data |
|                                |                                |                                                                                               | A programme for disinfection, decontamination and vector <sup>4</sup> control is established                                                             | WHO e-State Party Annual Reporting tool | Primary Data |
|                                |                                | <b>Preparedness</b>                                                                           | A Multi-hazard National Public Health Emergency Preparedness and Response Plan is developed.                                                             | WHO e-State Party Annual Reporting tool | Primary Data |
|                                |                                |                                                                                               | Priority public health risks and resources are mapped                                                                                                    | WHO e-State Party Annual Reporting tool | Primary Data |
|                                | <b>Risk communication</b>      | Mechanisms for effective risk communication during a public health emergency are established. | WHO e-State Party Annual Reporting tool                                                                                                                  | Primary Data                            |              |
|                                | <b>Human resource capacity</b> | Human resources available to implement IHR core capacity requirements                         | WHO e-State Party Annual Reporting tool                                                                                                                  | Primary Data                            |              |

|  |  |                                                      |                                                                                                            |                                         |              |
|--|--|------------------------------------------------------|------------------------------------------------------------------------------------------------------------|-----------------------------------------|--------------|
|  |  | <b>Laboratory</b>                                    | Coordinating mechanism for laboratory services is established.                                             | WHO e-State Party Annual Reporting tool | Primary Data |
|  |  |                                                      | Laboratory services are available to test for priority health threats                                      | WHO e-State Party Annual Reporting tool | Primary Data |
|  |  |                                                      | Influenza surveillance is established.                                                                     | WHO e-State Party Annual Reporting tool | Primary Data |
|  |  |                                                      | System for collection, packaging and transport of clinical specimens is established                        | WHO e-State Party Annual Reporting tool | Primary Data |
|  |  |                                                      | Laboratory biosafety and laboratory biosecurity (Biorisk management <sup>1</sup> ) practices are in place. | WHO e-State Party Annual Reporting tool | Primary Data |
|  |  |                                                      | Laboratory data management and reporting is established                                                    | WHO e-State Party Annual Reporting tool | Primary Data |
|  |  | <b>Points of Entry</b>                               | General obligations at PoE are fulfilled.                                                                  | WHO e-State Party Annual Reporting tool | Primary Data |
|  |  |                                                      | Coordination in the prevention, detection and response to public health emergencies at PoE is established. | WHO e-State Party Annual Reporting tool | Primary Data |
|  |  |                                                      | Effective surveillance and other routine capacities is established <sup>2</sup>                            | WHO e-State Party Annual Reporting tool | Primary Data |
|  |  |                                                      | Effective response at PoE is established.                                                                  | WHO e-State Party Annual Reporting tool | Primary Data |
|  |  | <b>IHR Potential hazard 1: zoonotic events</b>       | Mechanisms for detecting and responding to zoonoses and potential zoonoses are established.                | WHO e-State Party Annual Reporting tool | Primary Data |
|  |  | <b>IHR Potential hazard 2: food safety</b>           | Mechanisms are established for detecting and responding to foodborne disease and food contamination.       | WHO e-State Party Annual Reporting tool | Primary Data |
|  |  | <b>IHR Potential hazard 3: chemical events</b>       | Mechanisms are established for the detection, alert and response to chemical emergencies.                  | WHO e-State Party Annual Reporting tool | Primary Data |
|  |  | <b>IHR Potential hazard 4: radiation emergencies</b> | Mechanisms are established for detecting and responding to radiological and nuclear emergencies.           | WHO e-State Party Annual Reporting tool | Primary Data |

References



1. 2018 Ibrahim Index of African Governance [Internet]. The Mo Ibrahim Foundation; Available from: <https://mo-s3.ibrahim.foundation/u/2018/11/27173840/2018-Index-Report.pdf>
2. Primary Health Care on the Road to Universal Health Coverage MONITORING REPORT [Internet]. World Health Organization; 2019. Available from: [https://www.who.int/healthinfo/universal\\_health\\_coverage/report/uhc\\_report\\_2019.pdf?ua=1](https://www.who.int/healthinfo/universal_health_coverage/report/uhc_report_2019.pdf?ua=1)

### S3. Results of Construct Validity and Sensitivity Analyses

#### A. Construct validity

Pearson correlation coefficients were calculated to assess the associations between the system functionality Index and the UHC service coverage index as well as health system technical efficiency scores for UHC, where the correlation co-efficient  $r$ , was derived by:

$$r = \frac{n(\sum xy) - (\sum x)(\sum y)}{\sqrt{[n \sum x^2 - (\sum x)^2][n \sum y^2 - (\sum y)^2]}}$$

#### Trend Lines Model- UHC Service Coverage and Health System Functionality Scores

|                                          |                                                    |
|------------------------------------------|----------------------------------------------------|
| <b>Model formula:</b>                    | ( Overall Functionality (Arithmetic) + intercept ) |
| <b>Number of modeled observations:</b>   | 47                                                 |
| <b>Number of filtered observations:</b>  | 0                                                  |
| <b>Model degrees of freedom:</b>         | 2                                                  |
| <b>Residual degrees of freedom (DF):</b> | 45                                                 |
| <b>SSE (sum squared error):</b>          | 2323.66                                            |
| <b>MSE (mean squared error):</b>         | 51.6369                                            |
| <b>R-Squared:</b>                        | 0.7844                                             |
| <b>Standard error:</b>                   | 7.18588                                            |
| <b>p-value (significance):</b>           | < 0.0001                                           |

**Trend Lines Model- UHC Technical Efficiency Scores and Health System Functionality Scores**

A linear trend model is computed for Shephard Bias-Corrected technical efficiency score given Health System Functionality Scores.

**Model formula:** ( Health System Functionality Scores + intercept )  
**Number of modeled observations:** 43  
**Number of filtered observations:** 0  
**Model degrees of freedom:** 2  
**Residual degrees of freedom (DF):** 41  
**SSE (sum squared error):** 0.350087  
**MSE (mean squared error):** 0.0085387  
**R-Squared:** 0.6908  
**Standard error:** 0.0924051  
**p-value (significance):** < 0.0001

**Individual trend lines:**

| <b>Panes</b>                                        |                                    | <b>Line</b>    | <b>Coefficients</b> |                                    |              |               |                |                |
|-----------------------------------------------------|------------------------------------|----------------|---------------------|------------------------------------|--------------|---------------|----------------|----------------|
| <b>Row</b>                                          | <b>Column</b>                      | <b>p-value</b> | <b>D/F</b>          | <b>Term</b>                        | <b>Value</b> | <b>StdErr</b> | <b>t-value</b> | <b>p-value</b> |
| Shephard Bias-Corrected technical efficiency scores | Health System Functionality Scores | < 0.0001       | 41                  | Health System Functionality Scores | 0.00946      | 0.0015463     | 6.1178         | < 0.0001       |
|                                                     |                                    |                |                     | intercept                          | 0.242888     | 0.08483       | 2.86324        | 0.0065791      |

## Relationship between System Functionality and Funding Sources

**. correlate, means**

(country\_code ignored because string variable)

(country\_name ignored because string variable)

(obs=46)

| Variable     | Mean     | Std. Dev. | Min      | Max      |
|--------------|----------|-----------|----------|----------|
| overall_pe~e | 53.8212  | 9.029066  | 34.39359 | 75.77888 |
| che_ppp      | 294.4401 | 362.1163  | 37.33223 | 1485.474 |
| gghe_d_ppp   | 140.9336 | 234.5445  | 3.714186 | 1085.056 |
| ext_exp_che  | .2037603 | .1609583  | .0002143 | .61173   |
| domes_priv~p | 123.8236 | 159.4116  | 5.537313 | 719.5785 |
| Vol_health~p | 25.76528 | 76.88444  | .2039404 | 395.7728 |
| oop_exp_CHE  | 36.1519  | 21.28976  | 2.084186 | 87.66531 |
| other_priv~p | 33.54357 | 80.95197  | 1.41e-06 | 402.0437 |
| gghe_d_che   | 35.06681 | 18.7632   | 10.73426 | 95.97322 |

|              | overall~e | che_ppp | gghe_d~p | ext_ex~e | domes_~p | Vol_he~p | oop_ex~E | other_~p | gghe_d~e |
|--------------|-----------|---------|----------|----------|----------|----------|----------|----------|----------|
| overall_pe~e | 1.0000    |         |          |          |          |          |          |          |          |
| che_ppp      | 0.4820    | 1.0000  |          |          |          |          |          |          |          |
| gghe_d_ppp   | 0.5796    | 0.9499  | 1.0000   |          |          |          |          |          |          |
| ext_exp_che  | -0.1664   | -0.5316 | -0.4670  | 1.0000   |          |          |          |          |          |
| domes_priv~p | 0.1812    | 0.8608  | 0.6677   | -0.5897  | 1.0000   |          |          |          |          |
| Vol_health~p | 0.3402    | 0.5548  | 0.4694   | -0.3021  | 0.5540   | 1.0000   |          |          |          |
| oop_exp_CHE  | -0.5038   | -0.2210 | -0.2950  | -0.0892  | 0.0040   | -0.3558  | 1.0000   |          |          |
| other_priv~p | 0.3430    | 0.5788  | 0.4895   | -0.3195  | 0.5725   | 0.9938   | -0.3806  | 1.0000   |          |
| gghe_d_che   | 0.6037    | 0.4314  | 0.5075   | -0.2438  | 0.1944   | 0.3041   | -0.7015  | 0.3281   | 1.0000   |

## B. Sensitivity Analysis

Correlation coefficients were calculated for each of the methodological changes that were applied to the derived index for testing sensitivity.

*Correlation between index computed with arithmetic mean vs geometric mean*

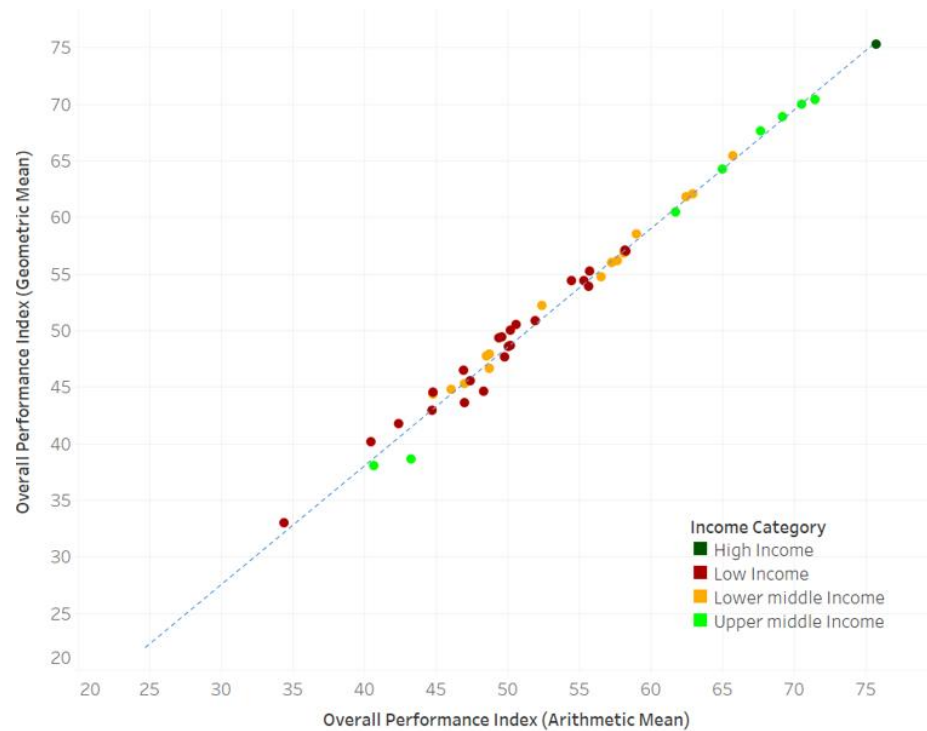

### Trend Lines Model

|                                          |                                                          |
|------------------------------------------|----------------------------------------------------------|
| <b>Model formula:</b>                    | ( Overall Functionality<br>(Arithmetic) +<br>intercept ) |
| <b>Number of modeled observations:</b>   | 47                                                       |
| <b>Number of filtered observations:</b>  | 0                                                        |
| <b>Model degrees of freedom:</b>         | 2                                                        |
| <b>Residual degrees of freedom (DF):</b> | 45                                                       |
| <b>SSE (sum squared error):</b>          | 39.33                                                    |
| <b>MSE (mean squared error):</b>         | 0.873999                                                 |
| <b>R-Squared:</b>                        | 0.990417                                                 |
| <b>Standard error:</b>                   | 0.934879                                                 |
| <b>p-value (significance):</b>           | < 0.0001                                                 |

Figure 1: Correlation between rescaled index under alternative index normalization approach vs. original normalization approach (base case)

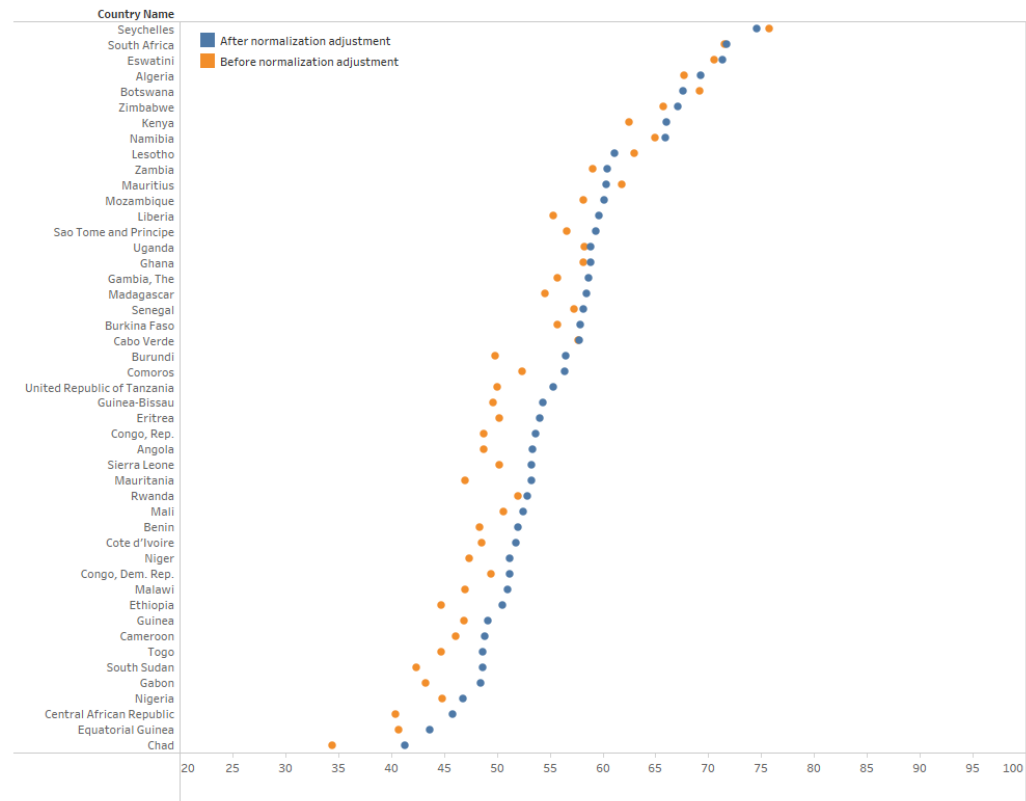

Spearman's Rank correlation coefficient:  $r=0.971$ ,  $p<0,001$

Table 1: Spearman rank correlation coefficient matrix of index values when dropping one indicator at a time for calculation of each capacity

**Capacity 1: Access**

| Original Access Index                                                                     | Drop Physicians density (per 1000 population) | Drop Nursing and midwifery personnel density (per 1000 population) | Drop Health Facility Density | Drop Hospital beds (per 1000 population) | Drop Domestic general government health expenditure (% of current health expenditure) | Drop Domestic general government health expenditure (% of general government expenditure) | Drop Out-of-pocket expenditure per capita, PPP (current international \$) | Drop Out-of-pocket expenditure (% of current health expenditure) | Drop Incidence of catastrophic expenditure (%): At 10% of household total consumption or income | Drop Secondary completion rate, female (% of relevant age group) | Drop Primary completion rate, female (% of relevant age group) | Drop Women's Labor Force Participation | Drop Intimate Partner Violence Against Women (%) |
|-------------------------------------------------------------------------------------------|-----------------------------------------------|--------------------------------------------------------------------|------------------------------|------------------------------------------|---------------------------------------------------------------------------------------|-------------------------------------------------------------------------------------------|---------------------------------------------------------------------------|------------------------------------------------------------------|-------------------------------------------------------------------------------------------------|------------------------------------------------------------------|----------------------------------------------------------------|----------------------------------------|--------------------------------------------------|
| Original Access Index                                                                     | 1.0000                                        |                                                                    |                              |                                          |                                                                                       |                                                                                           |                                                                           |                                                                  |                                                                                                 |                                                                  |                                                                |                                        |                                                  |
| Drop Physicians density (per 1000 population)                                             | 0.9964                                        | 1.0000                                                             |                              |                                          |                                                                                       |                                                                                           |                                                                           |                                                                  |                                                                                                 |                                                                  |                                                                |                                        |                                                  |
| Drop Nursing and midwifery personnel density (per 1000 population)                        | 0.9951                                        | 0.9943                                                             | 1.0000                       |                                          |                                                                                       |                                                                                           |                                                                           |                                                                  |                                                                                                 |                                                                  |                                                                |                                        |                                                  |
| Drop Health Facility Density                                                              | 0.9711                                        | 0.9697                                                             | 0.9660                       | 1.0000                                   |                                                                                       |                                                                                           |                                                                           |                                                                  |                                                                                                 |                                                                  |                                                                |                                        |                                                  |
| Drop Hospital beds (per 1000 population)                                                  | 0.9437                                        | 0.9367                                                             | 0.9335                       | 0.9447                                   | 1.0000                                                                                |                                                                                           |                                                                           |                                                                  |                                                                                                 |                                                                  |                                                                |                                        |                                                  |
| Drop Domestic general government health expenditure (% of current health expenditure)     | 0.9890                                        | 0.9876                                                             | 0.9846                       | 0.9657                                   | 0.9124                                                                                | 1.0000                                                                                    |                                                                           |                                                                  |                                                                                                 |                                                                  |                                                                |                                        |                                                  |
| Drop Domestic general government health expenditure (% of general government expenditure) | 0.9947                                        | 0.9943                                                             | 0.9888                       | 0.9581                                   | 0.9339                                                                                | 0.9872                                                                                    | 1.0000                                                                    |                                                                  |                                                                                                 |                                                                  |                                                                |                                        |                                                  |
| Drop Out-of-pocket expenditure per capita, PPP (current international \$)                 | 0.9943                                        | 0.9919                                                             | 0.9886                       | 0.9615                                   | 0.9385                                                                                | 0.9838                                                                                    | 0.9876                                                                    | 1.0000                                                           |                                                                                                 |                                                                  |                                                                |                                        |                                                  |

|                                                                                                 |        |        |        |        |        |        |        |        |        |        |        |        |        |        |
|-------------------------------------------------------------------------------------------------|--------|--------|--------|--------|--------|--------|--------|--------|--------|--------|--------|--------|--------|--------|
| Drop Out-of-pocket expenditure (% of current health expenditure)                                | 0.9743 | 0.9733 | 0.9721 | 0.9379 | 0.8889 | 0.9794 | 0.9687 | 0.9797 | 1.0000 |        |        |        |        |        |
| Drop Incidence of catastrophic expenditure (%): At 10% of household total consumption or income | 0.9850 | 0.9923 | 0.9809 | 0.9625 | 0.9090 | 0.9829 | 0.9816 | 0.9795 | 0.9707 | 1.0000 |        |        |        |        |
| Drop Secondary completion rate, female (% of relevant age group)                                | 0.9853 | 0.9835 | 0.9849 | 0.9605 | 0.9248 | 0.9698 | 0.9794 | 0.9720 | 0.9496 | 0.9669 | 1.0000 |        |        |        |
| Drop Primary completion rate, female (% of relevant age group)                                  | 0.9794 | 0.9776 | 0.9793 | 0.9546 | 0.9135 | 0.9669 | 0.9753 | 0.9667 | 0.9457 | 0.9653 | 0.9890 | 1.0000 |        |        |
| Drop Women's Labor Force Participation                                                          | 0.9794 | 0.9734 | 0.9734 | 0.9512 | 0.9295 | 0.9722 | 0.9706 | 0.9804 | 0.9667 | 0.9706 | 0.9592 | 0.9552 | 1.0000 |        |
| Drop Intimate Partner Violence Against Women (%)                                                | 0.9762 | 0.9764 | 0.9759 | 0.9529 | 0.9265 | 0.9603 | 0.9696 | 0.9662 | 0.9389 | 0.9731 | 0.9639 | 0.9640 | 0.9433 | 1.0000 |

## Capacity 2: Demand

| Original Demand Index | Drop Antenatal Coverage (% receiving 4+ visits) | Drop Community health workers density (per 1000 population) | Drop Total alcohol consumption per capita (liters of pure alcohol, projected estimates, 15+ years of age) | Drop Smoking prevalence, total (ages 15+) | Drop ANC 1 – ANC 4 drop out | Drop DTP 1 - DTP 3 drop out | Drop DTP3-MCV drop out | Drop Demand for family planning satisfied by modern methods (% of married women with demand for family planning) | Drop Care seeking behavior for child pneumonia |
|-----------------------|-------------------------------------------------|-------------------------------------------------------------|-----------------------------------------------------------------------------------------------------------|-------------------------------------------|-----------------------------|-----------------------------|------------------------|------------------------------------------------------------------------------------------------------------------|------------------------------------------------|
| Original Demand Index | 1.0000                                          |                                                             |                                                                                                           |                                           |                             |                             |                        |                                                                                                                  |                                                |



|                                                                                                                                 |        |        |        |        |        |        |        |        |        |
|---------------------------------------------------------------------------------------------------------------------------------|--------|--------|--------|--------|--------|--------|--------|--------|--------|
| Drop Antenatal Coverage<br>(% receiving 4+ visits)                                                                              | 0.9450 | 1.0000 |        |        |        |        |        |        |        |
| Drop Community health<br>workers density (per<br>1000 population)                                                               | 0.9616 | 0.9089 | 1.0000 |        |        |        |        |        |        |
| Drop Total alcohol<br>consumption per capita<br>(liters of pure alcohol,<br>projected estimates, 15+<br>years of age)           | 0.9476 | 0.8735 | 0.9148 | 1.0000 |        |        |        |        |        |
| Drop Smoking<br>prevalence, total (ages<br>15+)                                                                                 | 0.9593 | 0.8748 | 0.9185 | 0.9388 | 1.0000 |        |        |        |        |
| Drop ANC 1 – ANC 4<br>drop out                                                                                                  | 0.9517 | 0.9531 | 0.9274 | 0.8844 | 0.8899 | 1.0000 |        |        |        |
| Drop DTP 1 - DTP 3 drop<br>out                                                                                                  | 0.9728 | 0.9139 | 0.9304 | 0.9225 | 0.9073 | 0.9188 | 1.0000 |        |        |
| Drop DTP3-MCV drop<br>out                                                                                                       | 0.9845 | 0.9102 | 0.9373 | 0.9433 | 0.9492 | 0.9246 | 0.9687 | 1.0000 |        |
| Drop Demand for family<br>planning satisfied by<br>modern methods (% of<br>married women with<br>demand for family<br>planning) | 0.9228 | 0.8560 | 0.8838 | 0.8439 | 0.8531 | 0.8570 | 0.9049 | 0.9157 | 1.0000 |

Drop Care seeking  
behavior for child  
pneumonia

0.9423 0.9140 0.8745 0.8750 0.8881 0.9008 0.9137 0.9275 0.8802 1.0000

### Capacity 3: Quality

|                                                                             | Original Quality Index | Drop General<br>Service Readiness<br>(%) | Drop Satisfaction<br>with Basic Health<br>Services (%) | Drop Standard<br>Precautions for<br>Infection<br>Prevention and<br>Control (%) | Drop Still birth rate<br>(per 1000 total<br>births) | Drop Tuberculosis<br>treatment success<br>rate (% of new<br>cases) | Drop Mortality<br>from CVD, cancer,<br>diabetes or CRD<br>between exact ages<br>30 and 70 (%) | Drop Suicide<br>mortality rate (per<br>100,000<br>population) |
|-----------------------------------------------------------------------------|------------------------|------------------------------------------|--------------------------------------------------------|--------------------------------------------------------------------------------|-----------------------------------------------------|--------------------------------------------------------------------|-----------------------------------------------------------------------------------------------|---------------------------------------------------------------|
| Original Quality Index                                                      | 1.0000                 |                                          |                                                        |                                                                                |                                                     |                                                                    |                                                                                               |                                                               |
| Drop General Service<br>Readiness (%)                                       | 0.9602                 | 1.0000                                   |                                                        |                                                                                |                                                     |                                                                    |                                                                                               |                                                               |
| Drop Satisfaction with<br>Basic Health Services (%)                         | 0.9201                 | 0.8586                                   | 1.0000                                                 |                                                                                |                                                     |                                                                    |                                                                                               |                                                               |
| Drop Standard<br>Precautions for Infection<br>Prevention and Control<br>(%) | 0.9401                 | 0.9606                                   | 0.8389                                                 | 1.0000                                                                         |                                                     |                                                                    |                                                                                               |                                                               |
| Drop Still birth rate (per<br>1000 total births)                            | 0.8708                 | 0.8358                                   | 0.7369                                                 | 0.8201                                                                         | 1.0000                                              |                                                                    |                                                                                               |                                                               |

|                                                                                   |        |        |        |        |        |        |        |        |
|-----------------------------------------------------------------------------------|--------|--------|--------|--------|--------|--------|--------|--------|
| Drop Tuberculosis treatment success rate (% of new cases)                         | 0.9422 | 0.8970 | 0.8785 | 0.8778 | 0.8301 | 1.0000 |        |        |
| Drop Mortality from CVD, cancer, diabetes or CRD between exact ages 30 and 70 (%) | 0.8974 | 0.8408 | 0.7668 | 0.8042 | 0.7706 | 0.7919 | 1.0000 |        |
| Drop Suicide mortality rate (per 100,000 population)                              | 0.9198 | 0.8602 | 0.8173 | 0.8466 | 0.7061 | 0.8437 | 0.8920 | 1.0000 |

### Capacity 3: Resilience

|                            | Original Resilience Index | drop awareness_score | drop diversity_score | drop self-regulation_score | drop mobilisation_score | drop transformation_score |
|----------------------------|---------------------------|----------------------|----------------------|----------------------------|-------------------------|---------------------------|
| Original Resilience Index  | 1.0000                    |                      |                      |                            |                         |                           |
| drop awareness_score       | 0.9557                    | 1.0000               |                      |                            |                         |                           |
| drop diversity_score       | 0.9725                    | 0.9574               | 1.0000               |                            |                         |                           |
| drop self-regulation_score | 0.9642                    | 0.8645               | 0.9092               | 1.0000                     |                         |                           |
| drop mobilisation_score    | 0.6467                    | 0.5955               | 0.6050               | 0.6265                     | 1.0000                  |                           |

### Principal Component Analysis- Components and Eigenvectors

Principal components/correlation      Number of obs    =    47  
 Number of comp.    =    34  
 Trace                =    34  
 Rotation: (unrotated = principal)    Rho                =    1.0000

| Component | Eigenvalue | Difference | Proportion | Cumulative |
|-----------|------------|------------|------------|------------|
| Comp1     | 6.78768    | 2.4683     | 0.1996     | 0.1996     |
| Comp2     | 4.31938    | 1.3679     | 0.1270     | 0.3267     |
| Comp3     | 2.95148    | .176408    | 0.0868     | 0.4135     |
| Comp4     | 2.77507    | .434901    | 0.0816     | 0.4951     |
| Comp5     | 2.34017    | .337966    | 0.0688     | 0.5639     |
| Comp6     | 2.0022     | .275448    | 0.0589     | 0.6228     |
| Comp7     | 1.72676    | .283114    | 0.0508     | 0.6736     |
| Comp8     | 1.44364    | .190398    | 0.0425     | 0.7161     |
| Comp9     | 1.25324    | .0851438   | 0.0369     | 0.7529     |
| Comp10    | 1.1681     | .215858    | 0.0344     | 0.7873     |
| Comp11    | .952243    | .0365186   | 0.0280     | 0.8153     |
| Comp12    | .915724    | .135374    | 0.0269     | 0.8422     |
| Comp13    | .78035     | .113981    | 0.0230     | 0.8652     |
| Comp14    | .666369    | .0441545   | 0.0196     | 0.8848     |
| Comp15    | .622215    | .137601    | 0.0183     | 0.9031     |
| Comp16    | .484614    | .0625038   | 0.0143     | 0.9173     |
| Comp17    | .42211     | .0539185   | 0.0124     | 0.9297     |
| Comp18    | .368192    | .0359836   | 0.0108     | 0.9406     |
| Comp19    | .332208    | .0467717   | 0.0098     | 0.9503     |
| Comp20    | .285437    | .0064869   | 0.0084     | 0.9587     |
| Comp21    | .27095     | .0772345   | 0.0082     | 0.9669     |
| Comp22    | .201715    | .0172967   | 0.0059     | 0.9729     |
| Comp23    | .184419    | .0113126   | 0.0054     | 0.9783     |
| Comp24    | .173106    | .0223631   | 0.0051     | 0.9834     |
| Comp25    | .150743    | .016953    | 0.0044     | 0.9878     |
| Comp26    | .13379     | .0645462   | 0.0039     | 0.9918     |
| Comp27    | .0692438   | .00442925  | 0.0020     | 0.9938     |
| Comp28    | .0648145   | .0130981   | 0.0019     | 0.9957     |
| Comp29    | .0517164   | .0135425   | 0.0015     | 0.9972     |
| Comp30    | .0381739   | .0105229   | 0.0011     | 0.9983     |
| Comp31    | .027651    | .0108764   | 0.0008     | 0.9992     |
| Comp32    | .0167746   | .0100998   | 0.0005     | 0.9997     |
| Comp33    | .00667481  | .00164198  | 0.0002     | 0.9999     |
| Comp34    | .00503283  | .          | 0.0001     | 1.0000     |

Principal components (eigenvectors)

| Variable     | Comp1   | Comp2   | Comp3   | Comp4   | Comp5   | Comp6   | Comp7   | Comp8   | Comp9   |
|--------------|---------|---------|---------|---------|---------|---------|---------|---------|---------|
| gen_prac_d-s | 0.2615  | -0.0915 | 0.0841  | -0.0929 | 0.1543  | -0.1502 | 0.2515  | -0.1296 | -0.0461 |
| nurse_dens   | 0.3124  | -0.0862 | -0.0990 | 0.0495  | 0.0107  | -0.0866 | 0.1838  | -0.2023 | -0.0547 |
| fac_dens     | 0.1479  | -0.1311 | 0.0553  | 0.0648  | 0.0762  | 0.4444  | 0.0945  | -0.0389 | 0.1659  |
| bed_dens     | 0.0807  | -0.1166 | 0.0537  | -0.1071 | 0.2372  | 0.1045  | -0.3054 | 0.1874  | 0.1725  |
| dom_gen_gov  | 0.2955  | 0.0759  | -0.0083 | 0.1696  | -0.1824 | 0.0546  | 0.1224  | 0.0080  | 0.0377  |
| dom_gene_g-e | 0.0436  | 0.0535  | 0.2250  | -0.3913 | 0.1144  | -0.1666 | -0.0144 | -0.0434 | 0.0573  |
| oop_ppp      | -0.0577 | 0.3427  | 0.1694  | 0.1734  | -0.0171 | -0.0612 | 0.0279  | -0.0445 | 0.3117  |
| oop_che      | 0.2149  | 0.2317  | 0.0697  | 0.2790  | -0.1886 | 0.1036  | -0.0716 | 0.1259  | 0.0555  |
| cat_a_10     | 0.0936  | 0.2703  | 0.1851  | 0.2442  | -0.0847 | -0.0421 | 0.0042  | -0.0245 | -0.1054 |
| fem_sec_comp | 0.3206  | -0.0428 | 0.0929  | -0.1153 | 0.1684  | 0.0157  | 0.0176  | 0.0355  | 0.0196  |
| fem_pri_comp | 0.3054  | 0.0385  | 0.1131  | -0.0694 | 0.0902  | -0.0102 | -0.1011 | 0.0670  | 0.1122  |
| lab_force    | -0.0899 | 0.0804  | 0.0635  | 0.4195  | -0.1495 | -0.0633 | -0.1718 | -0.0259 | -0.1513 |
| ipv          | 0.1060  | 0.0720  | -0.0976 | -0.0621 | 0.3028  | -0.1501 | 0.3539  | -0.0315 | 0.1171  |
| anc_cov      | 0.2866  | -0.1215 | 0.0092  | -0.1200 | -0.0515 | -0.1078 | -0.0041 | 0.2827  | -0.0717 |
| chw          | 0.1408  | 0.0491  | -0.2316 | -0.0165 | -0.2137 | 0.0077  | -0.1634 | -0.1048 | 0.5221  |
| alc          | -0.1635 | 0.1066  | 0.1941  | 0.0291  | 0.1855  | -0.3674 | -0.0930 | 0.0454  | 0.1281  |
| smoke_prev   | -0.1274 | 0.0229  | 0.0433  | -0.0311 | 0.1953  | 0.3300  | 0.0435  | 0.2208  | 0.4167  |
| anc_drop     | 0.1785  | -0.2841 | -0.1381 | 0.0476  | -0.0901 | -0.0098 | -0.0051 | 0.2816  | -0.1640 |
| dtp_drop     | 0.1953  | 0.1938  | 0.1767  | -0.0187 | 0.0941  | -0.0502 | -0.0914 | -0.1687 | 0.0612  |
| dtp_ncv_drop | -0.0316 | 0.1061  | -0.0668 | 0.2977  | 0.3423  | 0.1001  | 0.1056  | 0.1303  | -0.2603 |
| fp           | 0.1632  | 0.2105  | 0.1033  | -0.0594 | 0.0039  | 0.1709  | -0.3863 | 0.0057  | -0.0654 |
| chi_pneu     | 0.2247  | 0.0193  | 0.1298  | 0.0513  | 0.0300  | -0.2229 | -0.0847 | 0.2734  | -0.1025 |
| gsr          | 0.1047  | -0.0230 | -0.2169 | 0.2451  | 0.1567  | -0.0967 | -0.1051 | -0.0781 | 0.2260  |
| sat_health   | 0.1392  | 0.0762  | -0.1460 | 0.0901  | 0.0712  | -0.0393 | 0.1529  | -0.5144 | 0.0146  |
| ipc          | -0.0170 | 0.1501  | -0.0894 | 0.0720  | -0.1326 | -0.4064 | 0.2011  | 0.4026  | 0.2183  |
| still_birth  | 0.3085  | 0.0055  | 0.1158  | -0.0049 | -0.0791 | 0.0349  | -0.1501 | -0.0160 | -0.0921 |
| tb_treat     | -0.0740 | 0.1113  | -0.0371 | -0.0489 | 0.3582  | -0.1700 | -0.4227 | -0.1505 | -0.1336 |
| mort_canc    | -0.0069 | 0.0114  | 0.4567  | -0.0105 | -0.0630 | 0.2282  | 0.1166  | -0.0674 | -0.0965 |
| suit         | -0.1091 | 0.1083  | 0.4027  | 0.0465  | 0.1100  | 0.0794  | 0.3128  | 0.1260  | 0.0365  |
| aware        | 0.0298  | -0.0645 | -0.1341 | 0.2614  | 0.4221  | 0.0515  | -0.0204 | 0.0888  | 0.0044  |
| div          | 0.0638  | 0.1519  | -0.2429 | 0.0838  | 0.2033  | 0.1866  | 0.0626  | 0.1911  | -0.0934 |
| self_regul-n | 0.0178  | 0.3901  | -0.1840 | -0.2024 | -0.0807 | 0.0406  | 0.0228  | 0.0782  | -0.1304 |
| mobilization | 0.0236  | 0.3658  | -0.1896 | -0.2249 | -0.0288 | 0.1362  | 0.0399  | 0.0769  | -0.1525 |
| transfrom    | -0.0246 | 0.3513  | -0.1988 | -0.2588 | 0.0245  | 0.1356  | 0.0850  | 0.0637  | -0.0776 |
